1  
2  
3  
4  
5  
6  
7  
8  
9  
10  
11  
12  
13  
14  
15  
16  
17  
18  
19  
20  
21  
22  
23  
24  
25

Original Article:

**Fusion of Video and Inertial Sensing Data via Dynamic  
Optimization of a Biomechanical Model**

Owen Pearl, MS

Doctoral Student in Mechanical Engineering, Carnegie Mellon University, Pittsburgh, PA, USA

Soyong Shin, MS

Doctoral Student in Mechanical Engineering, Carnegie Mellon University, Pittsburgh, PA, USA

Ashwin Godura

Undergraduate Student in Electrical Engineering, Carnegie Mellon University, Pittsburgh, PA,  
USA

Sarah Bergbreiter, PhD

Professor of Mechanical Engineering, Electrical Engineering, the Robotics Institute,  
Carnegie Mellon University, Pittsburgh, PA, USA

Eni Halilaj, PhD

Assistant Professor of Mechanical Engineering, Biomedical Engineering, the Robotics Institute,  
Carnegie Mellon University, Pittsburgh, PA, USA

Word Count: 3500

Please direct correspondence to: Eni Halilaj, PhD

Department of Mechanical Engineering, Carnegie Mellon University

5000 Forbes Ave, Pittsburgh, PA 15213

Email: [ehalilaj@andrew.cmu.edu](mailto:ehalilaj@andrew.cmu.edu) | Phone: 412-268-2183

26

## ABSTRACT

27 Inertial sensing and computer vision are promising alternatives to traditional optical motion  
28 tracking, but until now these data sources have been explored either in isolation or fused via  
29 unconstrained optimization, which may not take full advantage of their complementary strengths.  
30 By adding physiological plausibility and dynamical robustness to a proposed solution,  
31 biomechanical modeling may enable better fusion than unconstrained optimization. To test this  
32 hypothesis, we fused video and inertial sensing data via dynamic optimization with a nine degree-  
33 of-freedom model and investigated when this approach outperforms video-only, inertial-sensing-  
34 only, and unconstrained-fusion methods. We used both experimental and synthetic data that  
35 mimicked different ranges of video and inertial measurement unit (IMU) data noise. Fusion with a  
36 dynamically constrained model improved estimation of lower-extremity kinematics by a mean  $\pm$   
37 std root-mean-square error of  $6.0^\circ \pm 1.2^\circ$  over the video-only approach and estimation of joint  
38 centers by  $4.5 \pm 2.8$  cm over the IMU-only approach. It consistently outperformed single-modality  
39 approaches across different noise profiles. When the quality of video data was high and that of  
40 inertial data was low, dynamically constrained fusion improved joint kinematics by  $3.7^\circ \pm 1.2^\circ$  and  
41 joint centers by  $1.9 \pm 0.5$  cm over unconstrained fusion, while unconstrained fusion was  
42 advantageous by  $3.0^\circ \pm 1.4^\circ$  and  $1.2 \pm 0.7$  cm in the opposite scenario. These findings indicate  
43 that complementary modalities and techniques can improve motion tracking by clinically  
44 meaningful margins and that data quality and computational complexity must be considered when  
45 selecting the most appropriate method for a particular application.

46 **Key words:** kinematics, inertial measurement units, computer vision, direct collocation, simulation

47

## 1. INTRODUCTION

48 Accessible motion tracking could transform rehabilitation research and therapy. The traditional  
49 marker-based approach is limited to specialized laboratories equipped with expensive optical  
50 motion tracking systems and trained personnel. Inertial sensing and computer vision-based  
51 approaches offer greater flexibility, given their low cost and portability, but collective  
52 understanding of the strengths and weaknesses of kinematics estimation algorithms associated  
53 with each technology is still evolving (Table 1). Additionally, efforts to merge the strengths of these  
54 complementary technologies are sparse.

55

56 Vision-based methods are successful in camera-dense environments, but occlusion continues to  
57 pose challenges in reduced-camera settings (Joo et al., 2019). Although now widely used in  
58 robotics applications, translation of vision-based methods to human movement sciences remains  
59 uncommon due to accuracy limitations (Seethapathi et al., 2019). Computer vision models are  
60 data-driven and typically not constrained to satisfy physiological constraints. Biomechanical  
61 modeling has been considered as a possible approach for improving the accuracy of computer  
62 vision approaches and making them more accessible to the biomechanics community (Kanko et  
63 al., 2021; Strutzenberger et al., 2021; Uhlrich et al., 2022). Although comparisons with marker-  
64 based data suggest that the accuracy of these methods ranges widely between 3° – 20°,  
65 depending on the degree-of-freedom, no study to date has systematically discerned how this  
66 accuracy compares to alternative approaches and to what degree the incorporation of  
67 biomechanical models improves results.

68

69 Similarly, converting multimodal time series data from inertial measurement units (IMU) into  
70 accurate joint kinematics remains challenging due to the many possible sources of uncertainty,  
71 including bias noise, thermo-mechanical white noise, flicker noise, temperature effects, calibration  
72 errors, and soft-tissue artifacts (Park & Gao, 2008; Picerno, 2017). Traditional sensor fusion filters

73 used to mitigate drift (Madgwick, 2010; Mahony et al., 2008; Sabatini, 2011) typically rely on  
74 magnetometers, which are susceptible to ferromagnetic interferences (de Vries et al., 2009). The  
75 results of sensor-fusion filters have been refined with biomechanical models (Al Borno et al.,  
76 2022), but whether findings will translate to natural environments remains uncertain because  
77 marker-based motion capture was used for sensor-to-body calibration, IMUs impacted by  
78 ferromagnetic disturbances were manually excluded, and the effect of soft-tissue motion was  
79 partly eliminated by attaching IMUs to solid marker cluster plates, helping the IMUs move rigidly  
80 with the marker clusters. Deep learning has been proposed as an alternative (Mundt et al., 2020;  
81 Rapp et al., 2021) but has been limited by datasets that are not representative of all activities and  
82 clinical populations. Constrained optimization via biomechanical modeling, both static and  
83 dynamic, has also been used for estimation of both kinematics and kinetics. Static optimization  
84 approaches rely on zero-velocity detection algorithms from joint constraints, external contacts,  
85 and additional sensors (GPS, RF-based local positioning sensors, barometers, etc.) to correct the  
86 position of the model at each step (Karatsidis et al., 2019; Roetenberg et al., 2013), while dynamic  
87 optimization approaches currently require that the motion be periodic (Dorschky et al., 2019), both  
88 of which limit ease of implementation and generalizability.

89

90 IMU and vision data have complementary strengths that can be leveraged to overcome their  
91 individual limitations, but it is unclear if fusion via a dynamically constrained biomechanical model  
92 would improve estimation of kinematics over unconstrained optimization (Halilaj et al., 2021).  
93 Inertial sensing can compensate for occlusions in videos, videos can compensate for drift in  
94 inertial data, and biomechanical models can add physiological plausibility and dynamical  
95 robustness. Here we fuse video and IMU data via dynamic optimization of a nine degree-of-  
96 freedom (DOF) model (Fig. 1) and investigate the circumstances under which this approach  
97 outperforms (1) standard computer vision techniques using video data, (2) dynamic optimization  
98 of a biomechanical model using IMU data, and (3) fusion of IMU and video data via unconstrained

99 optimization (i.e., without a biomechanical model). In addition to comparing these methods using  
100 experimental data, we quantified their sensitivity to IMU and video data noise by scaling each  
101 subject's unique noise backgrounds. We hypothesized that fusion of video and IMU data with  
102 biomechanically constrained optimization would improve estimation of kinematics over the  
103 alternatives under all the noise profiles. We have shared a MATLAB library to encourage testing  
104 of these techniques with additional data and the exploration of new scientific questions.

105

106

## 2. METHODS

### 2.1 Biomechanical Model

108 The planar biomechanical model consisted of seven rigid body segments (Fig. 1). One segment  
109 represented the head, arms, and torso and three segments represented each leg. Body-segment  
110 lengths, masses, and mass moment of inertias were estimated by scaling a three-dimensional  
111 musculoskeletal model based on 21 cadavers and 24 young adults (Delp et al., 1990, 2007) with  
112 marker-based motion capture data. The model state,  $\mathbf{z}$ , contained nine general coordinates,  $\mathbf{q}$ ,  
113 their generalized velocities,  $\mathbf{v}$ , consisting of the horizontal and vertical sagittal plane translation of  
114 the pelvis,  $x$  and  $y$ , and the sagittal plane rotation of the pelvis, hip joints, knee joints, and ankle  
115 joints,  $q_t, q_{lh}, q_{rh}, q_{lk}, q_{rk}, q_{la}, q_{ra}$ , respectively:

$$116 \quad \mathbf{z} = \begin{bmatrix} \mathbf{q} & \text{gen coords} \\ \mathbf{v} & \text{gen velocities} \end{bmatrix};$$

$$117 \quad \mathbf{q} = [x, y, q_t, q_{lh}, q_{rh}, q_{lk}, q_{rk}, q_{la}, q_{ra}]^T$$

118 The model control vector,  $\mathbf{u}$ , contained joint torques,  $\mathbf{T}$ , contact forces,  $\mathbf{F}$ , and residual forces  
119 accounting for dynamic inconsistencies due to modeling simplifications,  $\mathbf{R}$ :

$$120 \quad \mathbf{u} = \begin{bmatrix} \mathbf{T} & \text{joint torques} \\ \mathbf{F} & \text{contact forces} \\ \mathbf{R} & \text{residual forces} \end{bmatrix};$$

121  $\mathbf{T} = [T_t, T_{lh}, T_{rh}, T_{lk}, T_{rk}, T_{la}, T_{ra}]^T;$

122  $\mathbf{F} = [F_{lx}, F_{ly}, F_{rx}, F_{ry}]^T;$

123  $\mathbf{R} = [R_x, R_y]^T$

124 We used Autolev (Symbolic Dynamics Inc; Sunnyvale, CA) and Kane's equations of motion to  
125 derive symbolic expressions for the nine equations of motion in their explicit form and  
126 implemented them in MATLAB (Mathworks, Inc; Natick, MA):

127  $\mathbf{z}' = f(\mathbf{z}, \mathbf{u})$

128

## 129 *2.2 Experimental Data*

130 To test the four markerless approaches for predicting joint kinematics, we used overground  
131 walking data from five subjects (4 male; 1 female) from Total Capture (Fig. 2a), a publicly available  
132 dataset commonly used to benchmark computer vision methods for motion tracking (Trumble et  
133 al., 2017). Motion was captured in a 4 x 6 m area with eight high definition (HD) video cameras at  
134 60 Hz, seven Xsens IMUs (Xsens; Enschede, The Netherlands) positioned on the pelvis, left and  
135 right thigh, left and right shank, left and right foot at 1000 Hz, and a marker-based motion capture  
136 system (Vicon Industries, Inc; Hauppauge, NY) at 100 Hz. Sagittal plane projections of the video  
137 and IMU data were used as inputs for the biomechanical model.

138

## 139 *2.3 Kinematics Estimation: Vision-Only*

140 We extracted two-dimensional (2-D) keypoints (i.e., joint centers) and the confidence score  
141 associated with each keypoint from each video camera using the Cascaded Pyramid Network  
142 (CPN) (Chen et al., 2018). We triangulated the keypoints by using a direct linear transformation  
143 algorithm to extract three-dimensional (3-D) keypoints (Hartley & Sturm, 1997). Contributions  
144 from each video were weighted by the confidence score associated with the corresponding 2-D

145 keypoint. We computed kinematics by minimizing the error between the triangulated keypoints  
 146 derived from video data and the joint centers of the biomechanical model.

147

#### 148 *2.4 Kinematics Estimation: Dynamically Constrained Fusion*

149 Our proposed approach fuses video and IMU data by finding the model states  $\mathbf{z}(t)$  and controls  
 150  $\mathbf{u}(t)$  over time, such that the simulated keypoint locations and body segment accelerations and  
 151 angular velocities from the model state match those obtained from experimental video and IMU  
 152 data. This was done by formulating the following optimal control problem and solving it via direct  
 153 collocation:

$$154 \quad \underset{\mathbf{x}(t), \mathbf{u}(t)}{\text{minimize}} \quad J(\mathbf{z}(t), \mathbf{z}'(t), \mathbf{u}(t))$$

$$155 \quad \text{subject to} \quad \mathbf{z}' = f(\mathbf{z}, \mathbf{u})$$

$$156 \quad \mathbf{x}_L \leq \mathbf{x} \leq \mathbf{x}_U$$

$$157 \quad \mathbf{u}_L \leq \mathbf{u} \leq \mathbf{u}_U$$

158 The cost functional  $J(\mathbf{z}(t), \mathbf{z}'(t), \mathbf{u}(t))$  is minimized with respect to a bounded state and control  
 159 and a constraint on the first derivative of the state vector from the explicit form of the equations of  
 160 motion. The cost functional includes a tracking term for both the keypoints and the inertial data,  
 161  $J_{track}$ , as well as an effort term for both the joint torque actuators and the residual forces,  $J_{effort}$  :

$$162 \quad J = J_{track} + J_{effort};$$

$$163 \quad J_{track} = \sum_{i=1}^{n_{keypoint}} \left[ (x_i^{keypoint} - x_i^{state})^2 + (y_i^{keypoint} - y_i^{state})^2 \right] \dots$$

$$164 \quad + \sum_{j=1}^{n_{IMU}} \left[ (\ddot{x}_j^{IMU} - \ddot{x}_j^{state})^2 + (\ddot{y}_j^{IMU} - \ddot{y}_j^{state})^2 + (\omega_j^{IMU} - \omega_j^{state})^2 \right];$$

$$165 \quad J_{effort} = \sum_{m=1}^{n_{torques}} (T_k)^2 + \sum_{n=1}^{n_{residuals}} (R_n)^2$$

166 We transcribed the large-scale, sparse nonlinear optimization problem via direct collocation using  
167 the OptimTraj library for MATLAB (Kelly, 2017).

168

### 169 *2.5 Kinematics Estimation: IMU-Only*

170 To perform dynamic optimization with IMU data alone, we took the same steps as in the  
171 dynamically constrained fusion approach (2.4) but removed the keypoint terms from within the  
172  $J_{track}$  portion of the cost. We followed a previously proposed method and applied the assumption  
173 that motion was periodic to overcome the drift resulting from integrating noisy IMU data (Dorschky  
174 et al., 2019). This involved segmenting the walking data into individual gait cycles and using the  
175 mean gait cycle as the input to the  $J_{track}$  term.

176

### 177 *2.6 Kinematics Estimation: Unconstrained Fusion*

178 For fusion of IMU and video data via unconstrained optimization, we formulated a simplified  
179 optimization problem where  $J_{track}$  from the IMU and vision optimization was minimized, excluding  
180  $J_{effort}$  and constraints on system dynamics and model controls (Halilaj et al., 2021). Here, the  
181 optimal set of kinematics was determined by minimizing the error between the experimental IMU  
182 and video data and the synthetic IMU and keypoint profiles projected from the subject's current  
183 state.

184

### 185 *2.7 Synthetic Data Generation*

186 In addition to building simulations with the experimentally captured data, we generated synthetic  
187 data to investigate how each of the four approaches responded to changes in noise magnitude.  
188 We first estimated the naturally occurring noise background,  $\varphi$ , from the experimental data.  
189 Ground truth trajectories for each joint center's position and each body segment's accelerations  
190 and angular velocities were calculated via marker-based motion capture data and analytic



191 equations formed in Autolev, as noted above. Noise was defined as the difference between the  
192 ground-truth trajectories and IMU-based (angular velocity and linear acceleration) or video-based  
193 (joint center position) trajectories. We multiplied this experimental noise background by a  
194 scale factor,  $S$ , to achieve synthetic data with new noise magnitudes, without editing the shape  
195 of the experimentally observed noise distribution:

$$196 \quad \varphi = data^{exp} - data^{mocap}$$

$$197 \quad data^{synth} = S\varphi + data^{mocap}$$

198

199 Using marker-based motion capture as the ground truth, the mean  $\pm$  standard deviation keypoint  
200 root-mean-square error (RMSE) for the five subjects was  $3.5 \pm 0.2$  cm. We scaled the naturally  
201 occurring noise background,  $\varphi$ , for each subject to RMSEs of 6.0, 3.5, and 1.0 cm by adjusting  
202 only the scale of the noise background while maintaining its original distribution. These new noise  
203 background magnitudes represented low, medium, and high accuracy conditions, based on  
204 single-view and multi-view approaches (Iskakov et al., 2019; Kadkhodamohammadi & Padoy,  
205 2019; Kanazawa et al., 2018; Kocabas et al., 2020). An RMSE of 6.0 cm corresponds to single-  
206 view approaches such as the Human Mesh Recovery (HMR) (Kanazawa et al., 2018) and Video  
207 Inference for Body Pose And Shape Estimation (VIBE) (Kocabas et al., 2020). An RMSE of 3.5  
208 cm corresponds to multi-camera algebraic triangulation approaches like what was used in this  
209 study. An RMSE of 1.0 cm corresponds to multi-camera methods incorporating learnable  
210 triangulation (Iskakov et al., 2019; Kadkhodamohammadi & Padoy, 2019). The IMU data had a  
211 mean  $\pm$  standard deviation signal-to-noise ratio (SNR) of  $13.2 \pm 0.4$  dB.

212

213 To generate the IMU synthetic data, we scaled the naturally occurring noise background for each  
214 subject to SNRs of 10, 17.5, and 25 dB, which represented low, medium, and high IMU accuracy  
215 conditions. These conditions corresponded to IMU data influenced by electrical noise in the form

216 of white noise, scale factor noise, and bias noise (Park & Gao, 2008), a range of commonly  
217 occurring static misplacement and misorientation errors (Tan et al., 2019), and a range of  
218 previously established soft-tissue motion magnitudes naturally occurring during walking  
219 (Fiorentino et al., 2017). To determine appropriate magnitudes to which the experimental IMU  
220 noise backgrounds would be scaled, we simulated combinations of misplacement, misorientation,  
221 and soft-tissue motion artifacts by formulating analytic equations for each body segment's  
222 accelerations and angular velocity in Autolev:

$$223 \mathbf{a}_x, \mathbf{a}_y, \boldsymbol{\omega}_z = f(\mathbf{q}, e_{\text{misplace}}, e_{\text{misalign}}, e_{\text{tissue}})$$

$$224 e_{\text{tissue}} \sim \mathcal{N}(\mu, \sigma^2)$$

225 We added error terms while deriving the body segment inertial profiles to model the static  
226 misplacement,  $e_{\text{misplace}}$ , the static misalignment,  $e_{\text{misalign}}$ , and the variable misplacement due to  
227 soft-tissue motion,  $e_{\text{tissue}}$ . We calculated the noise background magnitudes corresponding to  
228 these errors as the difference between the inertial profiles of the body segments derived with and  
229 without incorporating the sources of error, and then scaled the error terms to represent the range  
230 of expected naturally occurring noise magnitudes (Table 2). We sampled  $e_{\text{tissue}}$  from a normal  
231 distribution with  $\mu$  and  $\sigma$  equivalent to the mean and standard deviation of soft-tissue motion  
232 magnitudes measured through X-rays (Fiorentino et al., 2017).

233

## 234 *2.8 Performance Evaluation*

235 We computed mean-per-joint position error and joint angle error between the simulation results  
236 and ground truth marker-based motion capture data for each optimization approach and noise  
237 profile. We used a one-way repeated measures analysis of variance (RM-ANOVA) and Tukey's  
238 Honest Significant Difference (HSD) for post-hoc analysis to test the leading hypothesis that  
239 dynamically constrained fusion would result in lower kinematic errors compared to the other three  
240 approaches. The test was carried out for two primary kinematic outcomes: the mean full-body

241 RMSEs for joint angles and joint center positions. A two-way RM-ANOVA followed by an HSD  
242 test within noise conditions were used to test the second hypothesis that dynamically constrained  
243 fusion would outperform the other three methods when the data were characterized by different  
244 noise profiles. The two-way RM-ANOVA considered both the four competing methods and the  
245 nine repeated combinations of IMU and video data noise profiles. Results are presented as mean  
246  $\pm$  standard deviation of the per-joint RMSE compared to marker-based motion capture. An  
247 Anderson-Darling test for normality was used to confirm that the data were normally distributed  
248 (Yap & Sim, 2011).

249

250

### 3. RESULTS

#### 251 *3.1 Comparison of Modeling Approaches*

252 Dynamically constrained fusion performed better than single-modality methods, but similarly to  
253 unconstrained fusion when using the experimental data (Fig. 2b; Fig. 3). It improved estimation  
254 of joint angles by  $6.0^\circ \pm 1.2^\circ$  ( $p < 0.0001$ ) over the vision-only approach and joint centers by  $4.5$   
255  $\pm 2.8$  cm ( $p = 0.0018$ ) over the IMU-only approach. Joint angle estimates with the vision-only  
256 approach were the least accurate of the four approaches, with RMSEs of  $5.1^\circ \pm 1.7^\circ$  at the hip,  
257  $9.7^\circ \pm 3.2^\circ$  at the knee, and  $16.0^\circ \pm 1.2^\circ$  at the ankle. Similarly, joint center position estimates with  
258 the IMU-only approach were the least accurate of the four approaches, producing errors ranging  
259 from  $5.6 \pm 2.4$  cm at the hip to  $6.8 \pm 3.3$  cm at the ankle. The two fusion approaches performed  
260 similarly to each other and better than single modality approaches by maintaining accuracy with  
261 respect to both joint angles and joint positions. However, dynamically constrained fusion did  
262 facilitate improvements over unconstrained fusion in estimates of the ankle angle by  $3.3^\circ \pm 1.3^\circ$   
263 ( $p = 0.0076$ ).

264

#### 265 *3.2 Sensitivity to Noise*

266 Dynamically constrained fusion performed better than unconstrained fusion when the accuracy of  
267 IMU data was low and the accuracy of the video data was high, whereas unconstrained fusion  
268 performed better in the opposite scenario (Fig. 4). When the IMU data were of low quality (SNR  
269 of 10 dB) and the predicted keypoints from video data were of high quality (RMSE of 1.0 cm),  
270 constrained fusion improved estimates of joint angles by RMSEs of  $3.7^\circ \pm 1.2^\circ$  ( $p < 0.0001$ ) and  
271 joint centers by  $1.9 \pm 0.5$  cm ( $p < 0.0001$ ) over unconstrained fusion. When the IMU data were of  
272 high quality (SNR of 25 dB) and the predicted keypoints were of low quality (RMSE of 6.0 cm),  
273 unconstrained fusion improved estimates of joint angles by  $3.0^\circ \pm 1.4^\circ$  ( $p = 0.0049$ ) and joint  
274 center positions by  $1.2 \pm 0.7$  cm ( $p = 0.0183$ ) over constrained fusion. However, when the quality  
275 of IMU data and predicted keypoints was scaled up and down simultaneously, differences  
276 between the fusion techniques were not significant.

277  
278 Single-modality approaches generally performed worse than fusion approaches across the varied  
279 data qualities, with some exceptions (Fig. 5). The vision-only approach resulted in significantly  
280 worse joint angle estimates than the fusion approaches at every condition except when very low  
281 IMU data quality (SNR of 10 dB) was paired with very high keypoint data quality (RMSE of 1 cm).  
282 At this condition, vision-only matched constrained fusion ( $p = 0.8071$ ) with a joint angle RMSE of  
283  $3.3^\circ \pm 0.5^\circ$ . The IMU-only approach resulted in significantly worse joint center position estimates  
284 compared to the fusion approaches at five out of the nine conditions (Fig. 6). At combinations of  
285 medium to excellent IMU data accuracy (17.5 – 25 dB) and poor to medium keypoint data  
286 accuracy (6.0 – 3.5 cm), the IMU-only approach performed equivalently to fusion methods.

287

#### 288 4. DISCUSSION

289 The complementary strengths of wearable sensing, computer vision, and biomechanical modeling  
290 could enhance our ability to capture motion and study gait with greater flexibility and cost-  
291 effectiveness than current marker-based approaches. Here, we proposed to fuse video and

292 inertial data with a biomechanical model that simultaneously tracks video and IMU data and  
293 investigated when this method improves estimation of kinematics over single-modality methods  
294 and unconstrained fusion. We found that fusion of video and inertial data improves kinematics  
295 over single-modality methods by achieving high accuracy for both joint angles and joint center  
296 positions across all the tested video and IMU noise backgrounds. We also found that dynamically  
297 constrained fusion with a biomechanical model is advantageous over unconstrained fusion when  
298 the quality of inertial sensing data is low and the quality of computer vision models is high,  
299 whereas unconstrained fusion is advantageous in the opposite case. When the inertial and vision  
300 data noise is equally low or equally high, both types of fusion work equally well, but unconstrained  
301 is more computationally efficient.

302

303 When interpreting these findings, it is important to consider some of the study's limitations.  
304 Biomechanical modeling simplifications—reducing degrees of freedom, modeling the head, arms,  
305 and torso as a single rigid body, and connecting bones to joints by their end points—can affect  
306 the results of simulations. Yet, this simplified approach provides baseline insight on how physics-  
307 based modeling can contribute to improvement of IMU-video fusion. We expect that models with  
308 greater complexities and constraints, like OpenSim, will amplify but not overturn the conclusions  
309 drawn here. Furthermore, we created synthetic data for testing each approach across different  
310 noise magnitudes by simply scaling the noise backgrounds inherent to the experimental IMU and  
311 video data. We find this approach elegant and the assumption that the noise distribution remains  
312 constant across noise magnitudes more reasonable than making assumptions about that  
313 distribution (e.g., Gaussian, uniform, etc.), but a validation of the synthetically scaled noise profiles  
314 could be used to test that hypothesis in the future. A final limitation is that only walking was  
315 considered here. It remains to be determined if the reported findings hold across other activities.

316

317 The finding that fusion of video and IMU data is advantageous to single-modality approaches is  
318 consistent with findings from other disciplines, despite the lack of exploration in biomechanics.  
319 State estimation and simultaneous localization and mapping (SLAM) in autonomous robot  
320 navigation is commonly achieved by fusing IMU and video data with extended Kalman filters (R.  
321 Smith et al., 1990) and modified particle filters (Montemerlo et al., 2002). Currently, this fusion  
322 method provides the most viable alternative to GPS and lidar-based odometry in aerial navigation  
323 (Scaramuzza & Zhang, 2020). IMUs overcome visual SLAM limitations like occlusion, motion blur,  
324 a lack of visible textures, and inaccurate velocity and acceleration estimates, while videos help  
325 enable IMU recalibration in real-time to overcome drift (Mirzaei & Roumeliotis, 2008; Nikolic et al.,  
326 2014). The complementary nature of videos and IMUs explains why fusion methods consistently  
327 outperformed single-modality methods across the entire range of tested noise conditions and why  
328 they should be adopted in biomechanics as they are in robot-state estimation. However, while  
329 fusion is generally better, attention must be paid to both data quality and computational cost to  
330 select the most appropriate fusion approach for a particular application.

331  
332 The overlap between biomechanical models and IMUs causes the unconstrained and  
333 biomechanically constrained fusion approaches to diverge under specific noise conditions.  
334 Biomechanical models provide mathematical expressions relating applied forces to rigid-body  
335 accelerations and velocities. IMUs provide experimental measurements of rigid-body  
336 accelerations and angular velocities. When IMU data are inaccurate, adding a model is beneficial  
337 because the underlying optimizer can leverage the model's physics information and reduce its  
338 dependence on the suboptimal IMU data. However, when the IMU data are more accurate than  
339 the model, given modeling simplifications, adding the model becomes detrimental. Because IMU  
340 data quality is limited by miscalibration errors and soft-tissue artifacts, the incorporation of a  
341 biomechanical model will likely remain beneficial for natural environment applications of fusion

342 methods. Furthermore, incorporation of a model is likely to benefit measurements of faster  
343 activities associated with larger skin deformations.

344

345 As the prevalence of health monitoring in natural environments increases, so will the frequency  
346 with which patients and clinicians are charged with setting up lightweight and portable health-  
347 monitoring systems. Markerless motion capture methods must therefore be robust to the IMU and  
348 camera miscalibrations resulting from suboptimal setups by nonexperts. Since fusion of  
349 complementary modalities has proven to be more robust to noisy data than single modality  
350 methods, we recommend greater emphasis be placed on thoroughly exploring and benchmarking  
351 data fusion approaches for biomechanical applications. Our work provides a preliminary  
352 comparison of emerging techniques that could make motion capture more accessible. Our  
353 findings could help researchers and clinicians make more informed decisions, weighing the  
354 required accuracy for a given application against sensor density and computational complexity.  
355 Our published code provides an opportunity to further verify our conclusions with real video and  
356 IMU data from different laboratories.

357 **Acknowledgements:**

358 Research reported in this publication was supported by the United States National Science  
359 Foundation (NSF) Graduate Research Fellowship Program (award numbers DGE1745016 and  
360 DGE2140739), a Korean Government Fellowship, and the NSF Disability and Rehabilitation  
361 Engineering program (award number CBET 2145473).

362

363 **Data Availability:**

364 All the code required to generate the findings of this study is made available via GitHub:

365 <https://github.com/CMU-MBL/IMUVisionBiomechanics.git>

366

367 **Conflict of Interest Statement:**

368 The authors declare no competing interests.



369

## References

- 370 Al Borno, M., O'Day, J., Ibarra, V., Dunne, J., Seth, A., Habib, A., Ong, C., Hicks, J., Uhrich, S.,  
371 & Delp, S. (2022). OpenSense: An open-source toolbox for inertial-measurement-unit-  
372 based measurement of lower extremity kinematics over long durations. *Journal of*  
373 *NeuroEngineering and Rehabilitation*, 19(1), 22. [https://doi.org/10.1186/s12984-022-](https://doi.org/10.1186/s12984-022-01001-x)  
374 01001-x
- 375 Bloesch, M., Burri, M., Sommer, H., Siegwart, R., & Hutter, M. (2018). The Two-State Implicit  
376 Filter Recursive Estimation for Mobile Robots. *IEEE Robotics and Automation Letters*,  
377 3(1), 573–580. <https://doi.org/10.1109/LRA.2017.2776340>
- 378 Bloesch, M., Gehring, C., Fankhauser, P., Hutter, M., Hoepflinger, M. A., & Siegwart, R. (2013).  
379 State estimation for legged robots on unstable and slippery terrain. *2013 IEEE/RSJ*  
380 *International Conference on Intelligent Robots and Systems*, 6058–6064.  
381 <https://doi.org/10.1109/IROS.2013.6697236>
- 382 Chen, Y., Wang, Z., Peng, Y., Zhang, Z., Yu, G., & Sun, J. (2018). Cascaded Pyramid Network  
383 for Multi-Person Pose Estimation. *ArXiv:1711.07319 [Cs]*.  
384 <http://arxiv.org/abs/1711.07319>
- 385 de Vries, W. H. K., Veeger, H. E. J., Baten, C. T. M., & van der Helm, F. C. T. (2009). Magnetic  
386 distortion in motion labs, implications for validating inertial magnetic sensors. *Gait &*  
387 *Posture*, 29(4), 535–541. <https://doi.org/10.1016/j.gaitpost.2008.12.004>
- 388 Delp, S. L., Anderson, F. C., Arnold, A. S., Loan, P., Habib, A., John, C. T., Guendelman, E., &  
389 Thelen, D. G. (2007). OpenSim: Open-Source Software to Create and Analyze Dynamic  
390 Simulations of Movement. *IEEE Transactions on Biomedical Engineering*, 54(11), 1940–  
391 1950. <https://doi.org/10.1109/TBME.2007.901024>
- 392 Delp, S. L., Loan, J. P., Hoy, M. G., Zajac, F. E., Topp, E. L., & Rosen, J. M. (1990). An  
393 interactive graphics-based model of the lower extremity to study orthopaedic surgical

- 394 procedures. *IEEE Transactions on Biomedical Engineering*, 37(8), 757–767.  
395 <https://doi.org/10.1109/10.102791>
- 396 Dorschky, E., Nitschke, M., Seifer, A.-K., van den Bogert, A. J., & Eskofier, B. M. (2019).  
397 Estimation of gait kinematics and kinetics from inertial sensor data using optimal control  
398 of musculoskeletal models. *Journal of Biomechanics*, 95, 109278.  
399 <https://doi.org/10.1016/j.jbiomech.2019.07.022>
- 400 Fiorentino, N. M., Atkins, P. R., Kutschke, M. J., Goebel, J. M., Foreman, K. B., & Anderson, A.  
401 E. (2017). Soft tissue artifact causes significant errors in the calculation of joint angles  
402 and range of motion at the hip. *Gait & Posture*, 55, 184–190.  
403 <https://doi.org/10.1016/j.gaitpost.2017.03.033>
- 404 Halilaj, E., Shin, S., Rapp, E., & Xiang, D. (2021). American Society of Biomechanics Early  
405 Career Achievement Award 2020: Toward Portable and Modular Biomechanics Labs:  
406 How Video and IMU Fusion Will Change Gait Analysis. *Journal of Biomechanics*,  
407 110650. <https://doi.org/10.1016/j.jbiomech.2021.110650>
- 408 Hartley, R. I., & Sturm, P. (1997). Triangulation. *Computer Vision and Image Understanding*,  
409 68(2), 146–157. <https://doi.org/10.1006/cviu.1997.0547>
- 410 Huang, Y., Kaufmann, M., Aksan, E., Black, M. J., Hilliges, O., & Pons-Moll, G. (2018). Deep  
411 inertial poser: Learning to reconstruct human pose from sparse inertial measurements in  
412 real time. *ACM Transactions on Graphics*, 37(6), 1–15.  
413 <https://doi.org/10.1145/3272127.3275108>
- 414 Iskakov, K., Burkov, E., Lempitsky, V., & Malkov, Y. (2019). Learnable Triangulation of Human  
415 Pose. *ArXiv:1905.05754 [Cs]*. <http://arxiv.org/abs/1905.05754>
- 416 Joo, H., Simon, T., Li, X., Liu, H., Tan, L., Gui, L., Banerjee, S., Godisart, T., Nabbe, B.,  
417 Matthews, I., Kanade, T., Nobuhara, S., & Sheikh, Y. (2019). Panoptic Studio: A  
418 Massively Multiview System for Social Interaction Capture. *IEEE Transactions on*

- 419            *Pattern Analysis and Machine Intelligence*, 41(1), 190–204.
- 420            <https://doi.org/10.1109/TPAMI.2017.2782743>
- 421    Kadkhodamohammadi, A., & Padoy, N. (2019). *A generalizable approach for multi-view 3D*
- 422            *human pose regression* (arXiv:1804.10462). arXiv. <http://arxiv.org/abs/1804.10462>
- 423    Kanazawa, A., Black, M. J., Jacobs, D. W., & Malik, J. (2018). End-to-end Recovery of Human
- 424            Shape and Pose. *ArXiv:1712.06584 [Cs]*. <http://arxiv.org/abs/1712.06584>
- 425    Kanko, R. M., Laende, E. K., Davis, E. M., Selbie, W. S., & Deluzio, K. J. (2021). Concurrent
- 426            assessment of gait kinematics using marker-based and markerless motion capture.
- 427            *Journal of Biomechanics*, 127, 110665. <https://doi.org/10.1016/j.jbiomech.2021.110665>
- 428    Karatsidis, A., Bellusci, G., Schepers, H., de Zee, M., Andersen, M., & Veltink, P. (2016).
- 429            Estimation of Ground Reaction Forces and Moments During Gait Using Only Inertial
- 430            Motion Capture. *Sensors*, 17(12), 75. <https://doi.org/10.3390/s17010075>
- 431    Karatsidis, A., Jung, M., Schepers, H. M., Bellusci, G., de Zee, M., Veltink, P. H., & Andersen,
- 432            M. S. (2018). Predicting kinetics using musculoskeletal modeling and inertial motion
- 433            capture. *ArXiv:1801.01668 [Physics]*. <http://arxiv.org/abs/1801.01668>
- 434    Karatsidis, A., Jung, M., Schepers, H. M., Bellusci, G., de Zee, M., Veltink, P. H., & Andersen,
- 435            M. S. (2019). Musculoskeletal model-based inverse dynamic analysis under ambulatory
- 436            conditions using inertial motion capture. *Medical Engineering & Physics*, 65, 68–77.
- 437            <https://doi.org/10.1016/j.medengphy.2018.12.021>
- 438    Kelly, M. (2017). An Introduction to Trajectory Optimization: How to Do Your Own Direct
- 439            Collocation. *SIAM Review*, 59(4), 849–904. <https://doi.org/10.1137/16M1062569>
- 440    Kocabas, M., Athanasiou, N., & Black, M. J. (2020). VIBE: Video Inference for Human Body
- 441            Pose and Shape Estimation. *ArXiv:1912.05656 [Cs]*. <http://arxiv.org/abs/1912.05656>
- 442    Madgwick, S. O. H. (2010). *An efficient orientation filter for inertial and inertial/magnetic sensor*
- 443            *arrays*. 32.

- 444 Mahony, R., Hamel, T., & Pflimlin, J.-M. (2008). Nonlinear Complementary Filters on the Special  
445 Orthogonal Group. *IEEE Transactions on Automatic Control*, 53(5), 1203–1218.  
446 <https://doi.org/10.1109/TAC.2008.923738>
- 447 Marra, C., Chen, J. L., Coravos, A., & Stern, A. D. (2020). Quantifying the use of connected  
448 digital products in clinical research. *Npj Digital Medicine*, 3(1), 50.  
449 <https://doi.org/10.1038/s41746-020-0259-x>
- 450 Mirzaei, F. M., & Roumeliotis, S. I. (2008). A Kalman Filter-Based Algorithm for IMU-Camera  
451 Calibration: Observability Analysis and Performance Evaluation. *IEEE Transactions on*  
452 *Robotics*, 24(5), 1143–1156. <https://doi.org/10.1109/TRO.2008.2004486>
- 453 Montemerlo, M., Thrun, S., Koller, D., & Wegbreit, B. (2002). FastSLAM: A Factored Solution to  
454 the Simultaneous Localization and Mapping Problem. *AAAI-02 Proceedings*, 6.
- 455 Mundt, M., Johnson, W. R., Potthast, W., Markert, B., Mian, A., & Alderson, J. (2021). A  
456 Comparison of Three Neural Network Approaches for Estimating Joint Angles and  
457 Moments from Inertial Measurement Units. *Sensors*, 21(13), 4535.  
458 <https://doi.org/10.3390/s21134535>
- 459 Mundt, M., Thomsen, W., Witter, T., Koeppe, A., David, S., Bamer, F., Potthast, W., & Markert,  
460 B. (2020). Prediction of lower limb joint angles and moments during gait using artificial  
461 neural networks. *Medical & Biological Engineering & Computing*, 58(1), 211–225.  
462 <https://doi.org/10.1007/s11517-019-02061-3>
- 463 Nikolic, J., Rehder, J., Burri, M., Gohl, P., Leutenegger, S., Furgale, P. T., & Siegwart, R.  
464 (2014). A synchronized visual-inertial sensor system with FPGA pre-processing for  
465 accurate real-time SLAM. *2014 IEEE International Conference on Robotics and*  
466 *Automation (ICRA)*, 431–437. <https://doi.org/10.1109/ICRA.2014.6906892>
- 467 Park, M., & Gao, Y. (2008). Error and Performance Analysis of MEMS-based Inertial Sensors  
468 with a Low-cost GPS Receiver. *Sensors*, 8(4), 2240–2261.  
469 <https://doi.org/10.3390/s8042240>

- 470 Petersen, A., & Koch, R. (2012). *Video-based realtime IMU-camera calibration for robot*  
471 *navigation* (N. Kehtarnavaz & M. F. Carlsohn, Eds.; p. 843706).  
472 <https://doi.org/10.1117/12.924066>
- 473 Picerno, P. (2017). 25 years of lower limb joint kinematics by using inertial and magnetic  
474 sensors: A review of methodological approaches. *Gait & Posture*, *51*, 239–246.  
475 <https://doi.org/10.1016/j.gaitpost.2016.11.008>
- 476 R. Smith, M. Self, & P. Cheeseman. (1990). Estimating uncertain spatial relationships in  
477 robotics. *Autonomous Robot Vehicles*.
- 478 Rapp, E., Shin, S., Thomsen, W., Ferber, R., & Halilaj, E. (2021). Estimation of kinematics from  
479 inertial measurement units using a combined deep learning and optimization framework.  
480 *Journal of Biomechanics*, *116*, 110229. <https://doi.org/10.1016/j.jbiomech.2021.110229>
- 481 Roetenberg, D., Luinge, H., & Slycke, P. (2013). *Xsens MVN: Full 6DOF Human Motion*  
482 *Tracking Using Miniature Inertial Sensors*. 10.
- 483 Sabatini, A. M. (2011). Estimating Three-Dimensional Orientation of Human Body Parts by  
484 Inertial/Magnetic Sensing. *Sensors*, *11*(2), 1489–1525.  
485 <https://doi.org/10.3390/s110201489>
- 486 Scaramuzza, D., & Zhang, Z. (2020). Aerial Robots, Visual-Inertial Odometry of. In M. H. Ang,  
487 O. Khatib, & B. Siciliano (Eds.), *Encyclopedia of Robotics* (pp. 1–9). Springer Berlin  
488 Heidelberg. [https://doi.org/10.1007/978-3-642-41610-1\\_71-1](https://doi.org/10.1007/978-3-642-41610-1_71-1)
- 489 Seethapathi, N., Wang, S., Saluja, R., Blohm, G., & Kording, K. P. (2019). *Movement science*  
490 *needs different pose tracking algorithms* (arXiv:1907.10226). arXiv.  
491 <http://arxiv.org/abs/1907.10226>
- 492 Strutzenberger, G., Kanko, R., Selbie, S., Schwameder, H., & Deluzio, K. (2021).  
493 *ASSESSMENT OF KINEMATIC CMJ DATA USING A DEEP LEARNING ALGORITHM-*  
494 *BASED MARKERLESS MOTION CAPTURE SYSTEM*. 4.

- 495 Tan, T., Chiasson, D. P., Hu, H., & Shull, P. B. (2019). Influence of IMU position and orientation  
496 placement errors on ground reaction force estimation. *Journal of Biomechanics*, *97*,  
497 109416. <https://doi.org/10.1016/j.jbiomech.2019.109416>
- 498 Trumble, M., Gilbert, A., Malleson, C., Hilton, A., & Collomosse, J. (2017). Total Capture: 3D  
499 Human Pose Estimation Fusing Video and Inertial Sensors. *Proceedings of the British*  
500 *Machine Vision Conference 2017*, 14. <https://doi.org/10.5244/C.31.14>
- 501 Uhlrich, S. D., Falisse, A., Kidziński, Ł., Muccini, J., Ko, M., Chaudhari, A. S., Hicks, J. L., &  
502 Delp, S. L. (2022). *OpenCap: 3D human movement dynamics from smartphone videos*  
503 [Preprint]. Bioengineering. <https://doi.org/10.1101/2022.07.07.499061>
- 504 Yap, B. W., & Sim, C. H. (2011). Comparisons of various types of normality tests. *Journal of*  
505 *Statistical Computation and Simulation*, *81*(12), 2141–2155.  
506 <https://doi.org/10.1080/00949655.2010.520163>
- 507 Yi, X., Zhou, Y., Golyanik, V., Habermann, M., Shimada, S., Theobalt, C., & Xu, F. (n.d.).  
508 *Physical Inertial Poser (PIP): Physics-aware Real-time Human Motion Tracking from*  
509 *Sparse Inertial Sensors*. 15.
- 510 Yi, X., Zhou, Y., & Xu, F. (2021). *TransPose: Real-time 3D Human Translation and Pose*  
511 *Estimation with Six Inertial Sensors* (arXiv:2105.04605). arXiv.  
512 <http://arxiv.org/abs/2105.04605>
- 513

TABLES

**Table 1.** Qualitative comparison of state-of-the-art IMU and video-based motion capture techniques for measuring joint kinematics.

| Modality      | Method                                               | Example Articles                                                                        | Advantages                                                                                                                                                                                                                 | Disadvantages                                                                                         |
|---------------|------------------------------------------------------|-----------------------------------------------------------------------------------------|----------------------------------------------------------------------------------------------------------------------------------------------------------------------------------------------------------------------------|-------------------------------------------------------------------------------------------------------|
| IMUs          | Sensor-fusion Filters (e.g., EKF, Madgwick, Mahoney) | Mahony, 2008.<br>Madgwick, 2010.<br>Sabatini, 2011.<br>Joukov, 2014.<br>Al Borno, 2022. | Computationally efficient;<br><br>Open source                                                                                                                                                                              | Magnetometers are often unreliable<br><br>Magnetometer-free approaches are inaccurate                 |
|               | Deep Learning (e.g., CNNs, LSTMs, Transformers)      | Huang, 2018.<br>Rapp, 2021.<br>Yi, 2021-22.<br>Mundt, 2020-2021.                        | Implicitly learns noise;<br><br>Open source                                                                                                                                                                                | Training data are not sufficiently representative of pathologies and activities                       |
|               | Biomechanical Modeling: Static Optimization          | Roetenberg, 2013.<br>Karatsidis, 2016-19.                                               | Predicts GRFs, muscle forces, and joint reaction forces                                                                                                                                                                    | Requires drift correction using additional sensors;<br><br>Computational cost;<br><br>Closed source   |
|               | Biomechanical Modeling: Direct Collocation           | Dorschky, 2019.                                                                         | Predicts GRFs, muscle forces, and joint reaction forces                                                                                                                                                                    | Requires drift correction using limiting assumptions;<br><br>Computational cost;<br><br>Closed source |
| Videos        | Deep learning & Unconstrained Optimization           | Kanazawa, 2018.<br>Iskakov, 2019.<br>Zhang, 2020.<br>Kocabas, 2020-21.                  | Computationally efficient;<br><br>Open source                                                                                                                                                                              | Data-driven: training data not representative of clinical populations;<br><br>Sensitive to occlusions |
|               | Deep Learning & Biomechanical Modeling               | Kanko, 2021.<br>Strutzenberger, 2021.<br>Uhlrich, 2022.                                 | Predicts GRFs, muscle forces, and joint reaction forces;<br><br>Open source                                                                                                                                                | Data-driven: training data not representative of clinical populations;<br><br>Computational cost      |
| IMUs & Videos | Deep learning & Unconstrained Optimization           | Halilaj, 2021.                                                                          | Computationally efficient;<br><br>Merges complementary modalities;<br><br>No integration of inertial data necessary                                                                                                        | Poor initial estimations from video are propagated in the optimization                                |
|               | Deep learning & Dynamically Constrained Optimization | Proposed Method                                                                         | Predicts GRFs, muscle forces, and joint reaction forces;<br><br>Merges complementary modalities while satisfying the laws of physics<br><br>No integration of inertial data necessary;<br><br>Accurate with noisy IMU data | Currently, 2-D proof of concept with 3-D validity remaining to be tested;<br><br>Computational cost   |

**Table 2.** Sources of uncertainty for each modeled IMU signal-to-noise ratio (SNR) profile.

| Misplacement (cm) | Misalignment (deg) | Soft-Tissue Motion (cm) | IMU SNR (dB) |
|-------------------|--------------------|-------------------------|--------------|
| 0.5               | 1                  | 0.5                     | 26.7         |
| 2.5               | 5                  | 1.0                     | 17.7         |
| 5.0               | 10                 | 5.0                     | 10.1         |

516



517

FIGURES

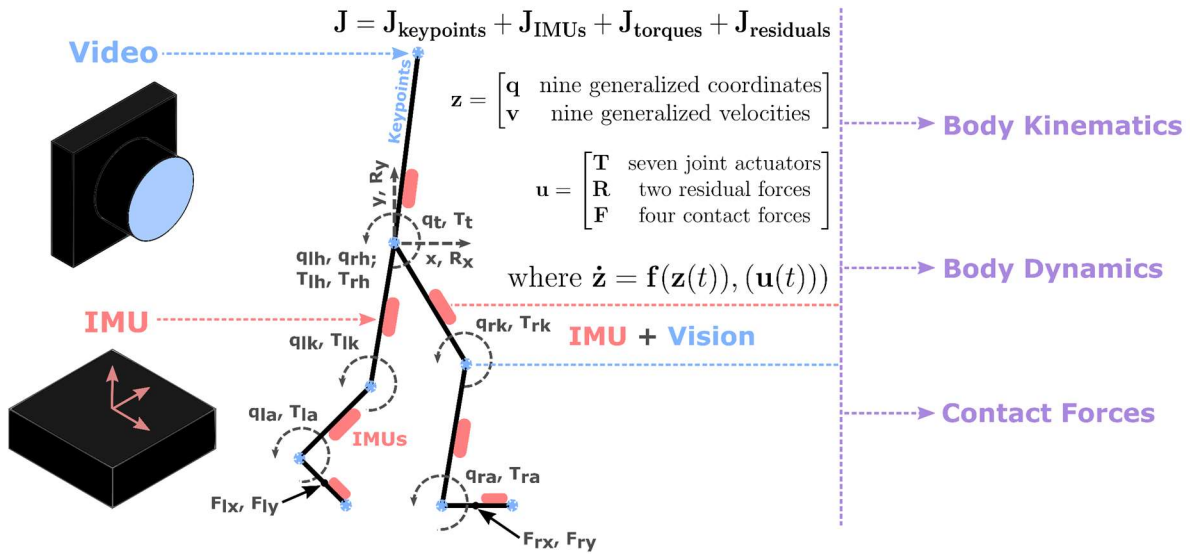

518

519 **Fig. 1. Biomechanical Model and Dynamics Overview.** Video and inertial measurement unit (IMU) data are fused  
 520 into a single optimal control trajectory tracking problem, where the state of a planar musculoskeletal model is optimized  
 521 to produce joint center trajectories and inertial profiles that match the experimental data. A nine degree-of-freedom (two  
 522 translational, seven rotational) model is actuated by seven joint torques, four ground contact forces, and two residual  
 523 forces accounting for dynamic inconsistencies due to modeling simplifications. The model fuses data from eight  
 524 anatomical keypoints acquired from three-dimensional triangulation of video data and seven inertial measurement units  
 525 placed on each rigid body segment. Direct collocation is used to minimize a cost functional with keypoint and IMU  
 526 tracking error costs and an effort cost for regulating the joint torques and residual forces.

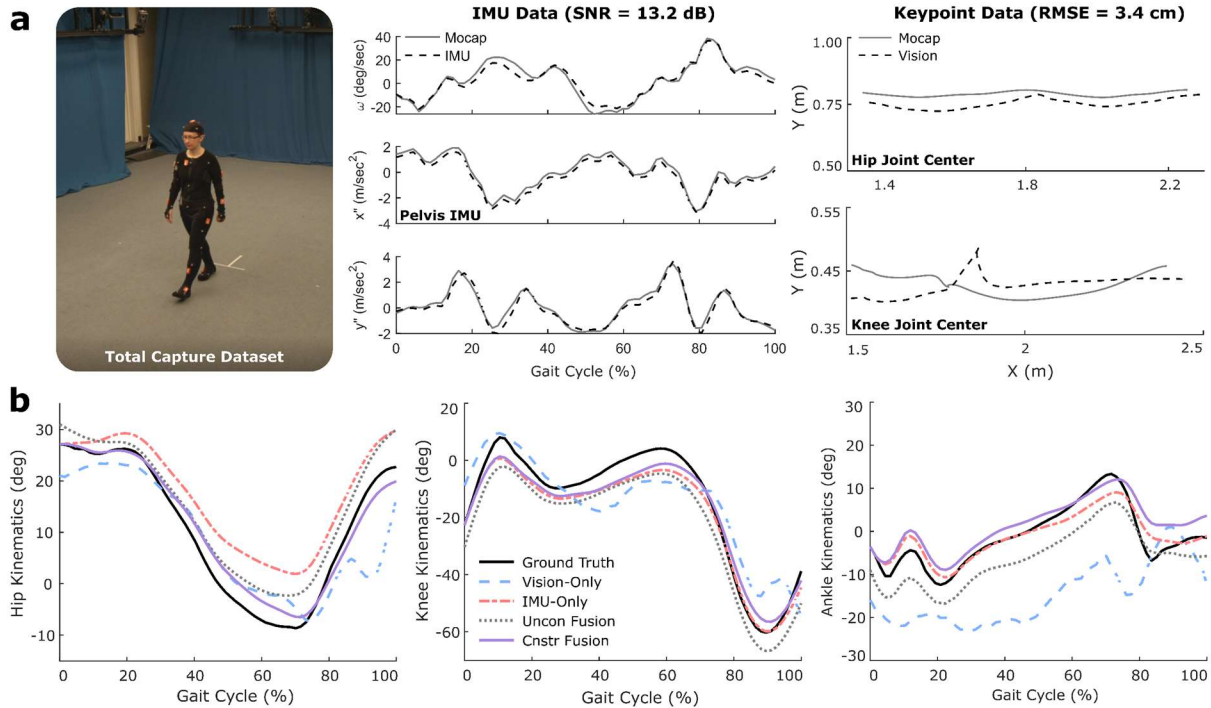

527

528 **Fig. 2. Experimental Data and Resulting Markerless Kinematics. (a)** Total Capture is a public dataset of five  
 529 subjects performing different activities, while recorded with marker-based motion capture, inertial measurement units  
 530 (IMU), and four videos. Only the walking trials were analyzed here. The IMU data had a signal-to-noise (SNR) ratio of  
 531 13.2 dB, while the video-based keypoints (i.e., joint center estimations) had a root-mean-squared error (RMSE) of 3.4  
 532 cm. **(b)** Dynamically constrained fusion of IMU and video data via a biomechanical model and direct collocation (Cnstr  
 533 Fusion, in solid magenta) improved kinematic predictions over competing markerless motion capture approaches  
 534 (shown for a single female subject). Each approach was tested on all subjects in the Total Capture Dataset after  
 535 calibrating IMU data, triangulating video data into 3D keypoints, and projecting 3D data into each subject's sagittal  
 536 plane. Noise levels of IMU and keypoint data were calculated with respect to marker-based motion capture as the  
 537 ground truth. Constrained fusion outperformed both single modality approaches and unconstrained fusion (Uncon  
 538 Fusion, in dashed gray) across the hip, knee, and ankle joint angles.

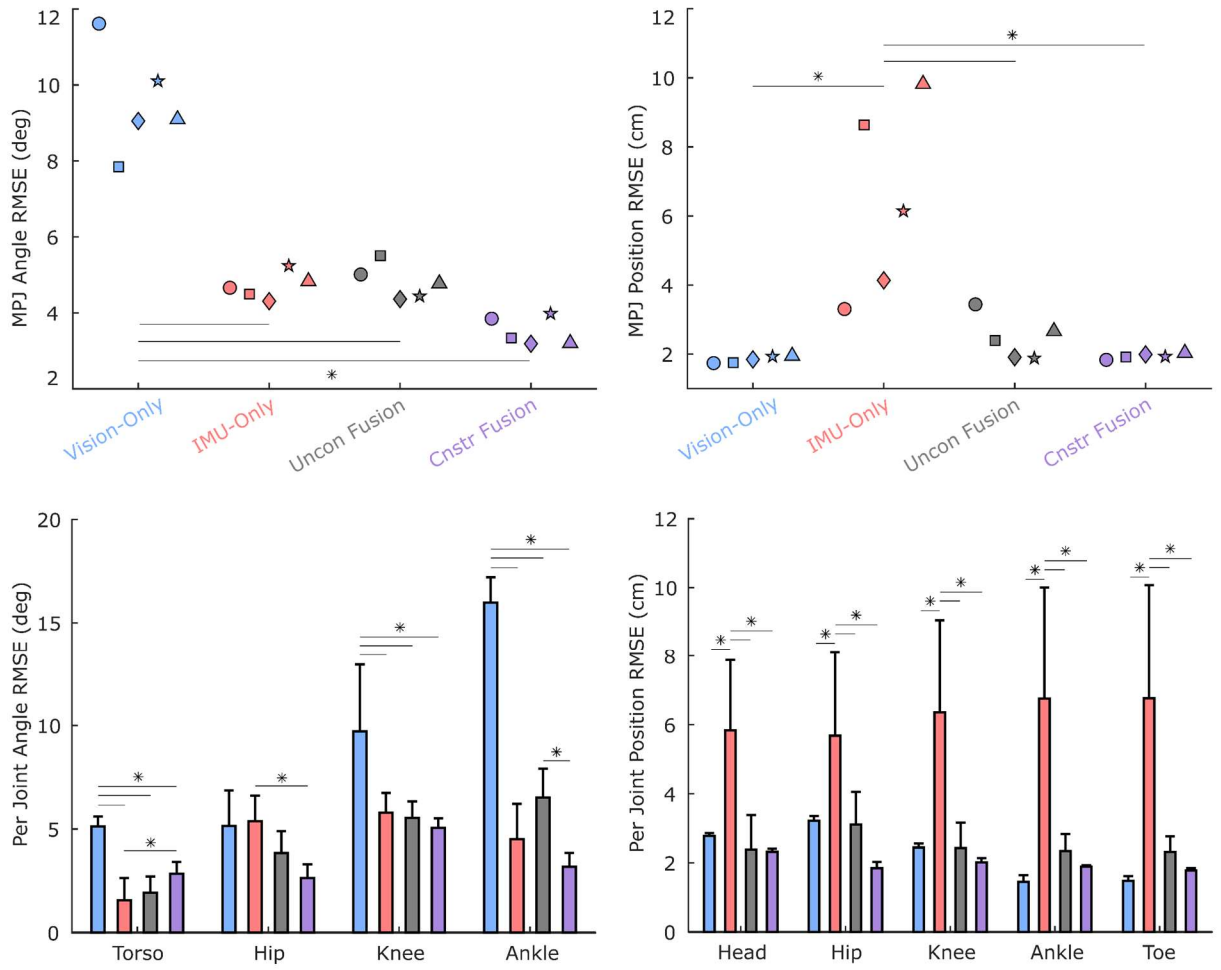

539

540 **Fig. 3. Comparison of Markerless Approaches.** Fusion approaches result in lower mean per joint (MPJ) angle root-  
 541 mean-square errors (RMSEs) (top left) than the vision-only approach and lower MPJ position RMSEs (top right) than  
 542 the IMU-only approach when tested on experimental data from the Total Capture dataset. Fusion methods resulted in  
 543 better accuracy than single modality methods by maintaining consistent accuracy with respect to both joint angles and  
 544 joint center positions across all individual joints. (\*p < 0.05)

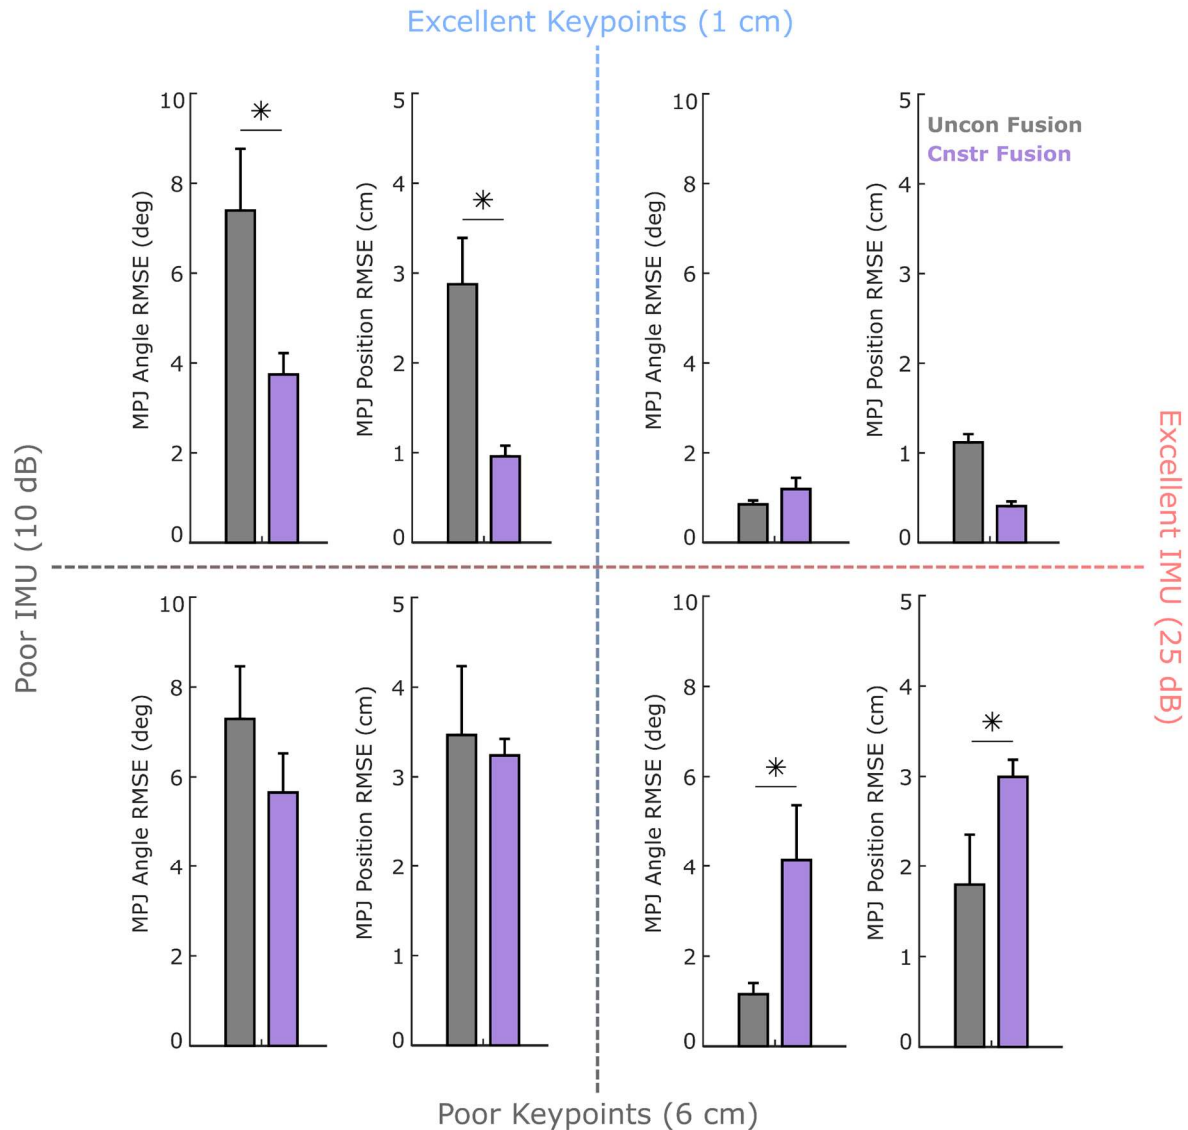

545

546 **Fig. 4. Sensitivity of Fusion Approaches to Noise.** Dynamically constrained fusion was advantageous at lower IMU  
 547 accuracies and higher keypoint accuracies, whereas unconstrained fusion was advantageous at higher IMU  
 548 accuracies and lower keypoints accuracies. This phenomenon occurs due to the sometimes complementary, but sometimes  
 549 redundant nature of IMU data and modeling constraints since both provide information on the first and second order  
 550 derivatives of the body segment motions. Mean  $\pm$  standard deviation is plotted here with \* $p < 0.05$ .

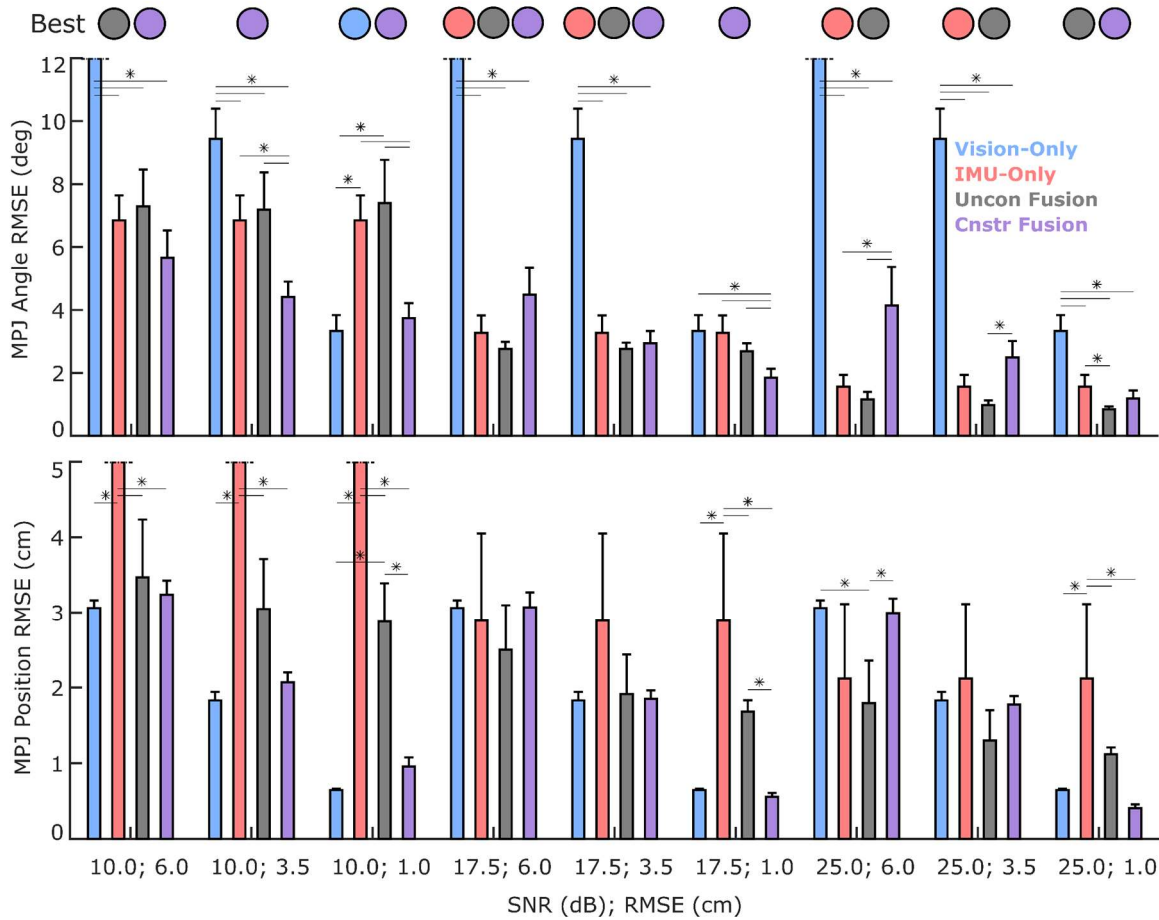

551

552 **Fig. 5. Sensitivity of Markerless Approaches to Noise.** Fusion approaches improve results over single modality  
 553 approaches across almost the entire noise spectrum with few exceptions. Vision-only is consistently outperformed with  
 554 respect to joint angles, while IMU-only is consistently outperformed with respect to joint center positions. The mean  $\pm$   
 555 standard deviation MPJ angle RMSE (top) and MPJ position RMSE (bottom) show the difference in kinematics  
 556 predictions across each noise condition for all four techniques. (\* $p < 0.05$ )

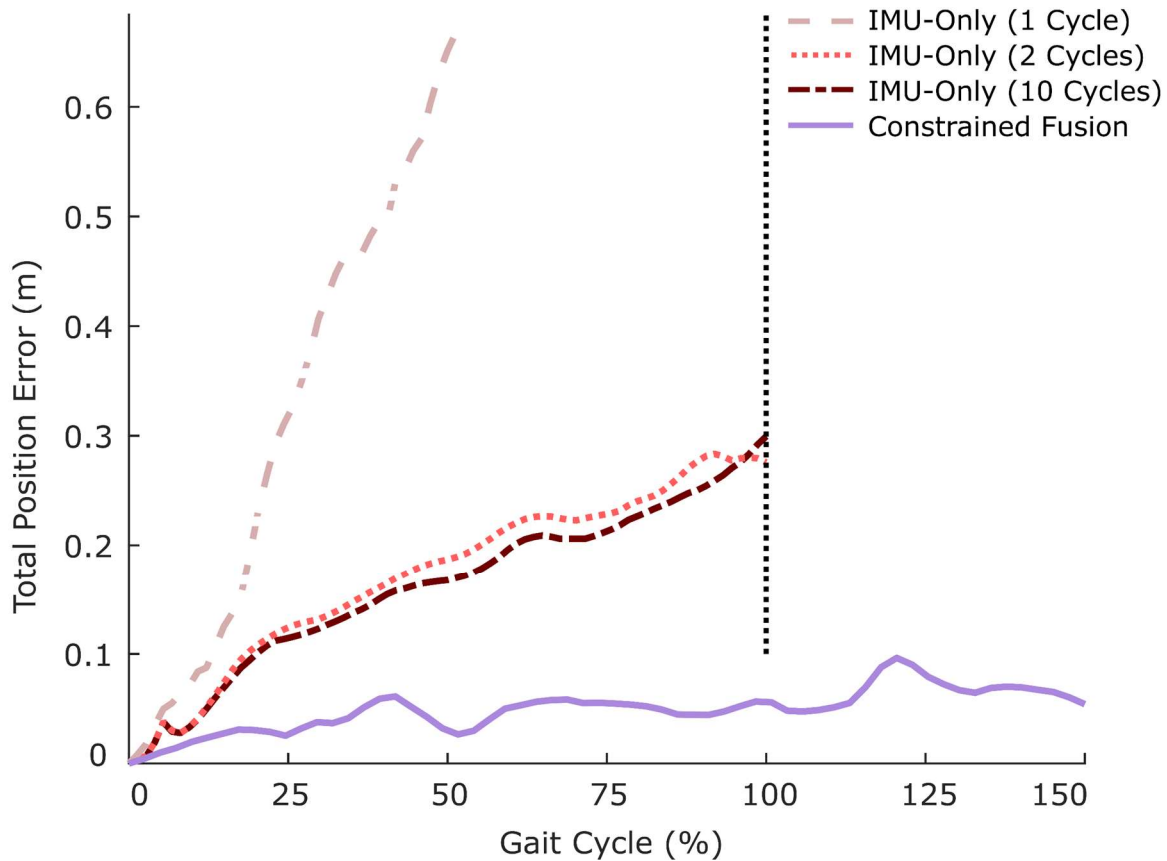

557

558 **Fig. 6. Error Accumulation with IMU Methods.** Observing the full body joint center position error over the gait cycle  
559 reveals that dynamically constrained fusion and the other techniques eventually reach an equilibrium error, while the  
560 IMU-only dynamic optimization continues to accumulate error throughout the simulation duration regardless of the  
561 starting IMU data accuracy or the level of denoising. All other approaches can also be run for any arbitrary amount of  
562 time, but IMU-only is restricted to complete gait cycles if the periodicity assumption is implemented to reduce drift.  
563 However, the rate of error accumulation can be reduced by averaging over multiple periodic gait cycles.
